# Supplementary material for: Overnight dynamics in scale-free and oscillatory spectral parameters of NREM sleep EEG
Source: PubMed Central journal article supplement (PMC9626458; doi:10.1038/s41598-022-23033-y), 2022-11-01
Supplement: 41598_2022_23033_MOESM1_ESM.pdf [file 41598_2022_23033_MOESM1_ESM.pdf]

# Overnight dynamics in scale-free and oscillatory spectral parameters of NREM sleep EEG

Csege G. Horváth <sup>1\*</sup>, Orsolya Szalárdy <sup>1,2</sup>, Péter P. Ujma <sup>1</sup>, Péter Simor <sup>3,4</sup>, Ferenc Gombos <sup>5,6</sup>, Ilona Kovács<sup>6</sup>, Martin Dresler<sup>7</sup>, Róbert Bódizs <sup>1</sup>

<sup>1</sup>Institute of Behavioural Sciences, Semmelweis University, Budapest, Hungary

<sup>2</sup> Institute of Cognitive Neuroscience and Psychology, Research Centre for Natural Sciences, Budapest, Hungary

<sup>3</sup>Institute of Psychology, ELTE, Eötvös Loránd University, Budapest, Hungary

<sup>4</sup>UR2NF, Neuropsychology and Functional Neuroimaging Research Unit at CRCN – Center for Research in Cognition and Neurosciences and UNI – ULB Neurosciences Institute, Université Libre de Bruxelles (ULB), Brussels, Belgium

<sup>5</sup>Laboratory for Psychological Research, Pázmány Péter Catholic University, Budapest, Hungary

<sup>6</sup>ELRN-ELTE-PPKE Adolescent Development Research Group, Eötvös Loránd University, Budapest, Hungary

<sup>7</sup>Donders Institute for Brain, Cognition and Behaviour, Radboud University Medical Center, Nijmegen, The Netherlands

**Suppl. Table 1. Percentage distribution of the location of maximal frequency shifts in the sample. Meaning of markings are the following: F-Fp: frontal-to-frontopolar, C-F: central-to-frontal, P-C: parietal-to-central, O-P: occipital-parietal. Numbers mean the percent of the occurrence of the maximum frequency shift in a given area.**

|      | 1. cycle (%) | 2. cycle (%) | 3. cycle (%) | 4. cycle (%) |
|------|--------------|--------------|--------------|--------------|
| F-Fp | 17.53        | 31.47        | 45.02        | 38.25        |
| C-F  | 54.18        | 50.60        | 41.83        | 40.64        |
| P-C  | 15.54        | 5.98         | 4.78         | 8.76         |
| O-P  | 3.98         | 4.38         | 2.79         | 4.78         |

**Suppl. Table 2. Means and standard deviations of  $f_{maxPeak}$  values in different age groups on different regions. Markings are the following: M=mean, SD=standard deviation, ch=children, t=teenager, y=young adult, m=middle-aged adult, Fp-Frontopolar region, F-Frontal region, C-central region, P-parietal region, O-Occipital region**

| Region | M <sub>ch</sub><br>(N=9) |      | M <sub>t</sub><br>(N=33) |      | M <sub>y</sub><br>(N=125) |      | M <sub>m</sub><br>(N=22) |      |
|--------|--------------------------|------|--------------------------|------|---------------------------|------|--------------------------|------|
|        | SD                       | SD   | SD                       | SD   | SD                        | SD   | SD                       |      |
| Fp     | 11.44                    | 0.25 | 12.25                    | 0.12 | 11.98                     | 0.06 | 11.56                    | 0.15 |
| F      | 11.63                    | 0.27 | 12.72                    | 0.13 | 12.39                     | 0.07 | 11.98                    | 0.17 |
| C      | 11.99                    | 0.22 | 13.16                    | 0.11 | 13.32                     | 0.06 | 13.36                    | 0.14 |
| P      | 12.20                    | 0.20 | 13.28                    | 0.10 | 13.47                     | 0.05 | 13.76                    | 0.12 |
| O      | 12.34                    | 0.18 | 13.34                    | 0.09 | 13.40                     | 0.05 | 13.82                    | 0.11 |

**Suppl. Table 3. P values of post hoc test about the region x age group interactions with respect to the  $f_{maxPeak}$  values. Markings: ch=children, t=teenagers, y=young adults, m=middle-aged adults, Fp-frontopolar region, F-frontal region, C-central region, P-parietal region, O-occipital region**

| Region | y vs. ch     | y vs. m | y vs. t | ch vs. m     | ch vs. t     | m vs. t      |
|--------|--------------|---------|---------|--------------|--------------|--------------|
| Fp     | 0.995        | 0.809   | 0.978   | 1.000        | 0.672        | <b>0.044</b> |
| F      | 0.796        | 0.769   | 0.805   | 1.000        | 0.090        | <b>0.008</b> |
| C      | <b>0.002</b> | 1.000   | 1.000   | <b>0.002</b> | <b>0.016</b> | 1.000        |
| P      | <b>0.003</b> | 0.999   | 1.000   | <b>0.000</b> | <b>0.029</b> | 0.719        |
| O      | <b>0.021</b> | 0.879   | 1.000   | <b>0.000</b> | <b>0.046</b> | 0.658        |
